# Supplementary material for: Synthesis, characterization, structural, optical properties and catalytic activity of reduced graphene oxide/copper nanocomposites
Source: Royal Society of Chemistry journal article supplement (doi:10.1039/c4ra12552e), 2015-01-01
Supplement: c4ra12552e1.pdf [file c4ra12552e1.pdf]

RSC Advances

Supporting Information

## Synthesis, characterization, structural, optical properties and catalytic activity of reduced graphene oxide/copper nanocomposites

Mahmoud Nasrollahzadeh<sup>a,\*</sup>, Ferydon Babaei<sup>b</sup>, Parisa Fakhri<sup>c</sup> and Babak Jaleh<sup>c</sup>

<sup>a</sup>Department of Chemistry, Faculty of science, University of Qom, P. O. Box 37185-359, Qom, Iran

<sup>b</sup>Department of Physics, Faculty of Science, University of Qom, Qom, Iran

<sup>c</sup>Department of Physics, Bu-Ali Sina University, Postal Code 65174, Hamedan, Iran

\*Corresponding author. Tel: +98 25 32850953; Fax: +98 25 32103595.

E-mail address: mahmoudnasr81@gmail.com

### The influence of Cu<sub>2</sub>O or CuO on the optical properties of RGO/Cu NPs

For more analysis, we simulated the absorbance spectra for RGO/CuO, RGO/Cu<sub>2</sub>O and a mixture of Cu (Cu, CuO and Cu<sub>2</sub>O) NPs phases on RGO. In our simulation, the volume fraction of CuO, Cu<sub>2</sub>O and a mixture of Cu NPs phases respectively  $f_{CuO} = 0.00002$ ,  $f_{Cu_2O} = 0.00006$ ,  $f_{M-Cu} = 0.0001$  were fixed. The optical refractive index (OPI) for CuO and Cu<sub>2</sub>O extracted from reference 1 and also refractive index for mixture Cu NPs considered as  $f_{Cu} * (OPI-Cu) + f_{CuO} * (OPI-CuO) + f_{Cu_2O} * (OPI-Cu_2O)$ . All absorbance spectra are depicted in Figure 1. It can be observed that optical absorbance spectra for Cu oxidized phases and mixture phase were supported on RGO almost are same as RGO/Cu NPs spectra. Then oxidized Cu NPs at lower volume fractions do not affect on optical band gap that extracted only from RGO/Cu NPs spectra. Therefore, the optical absorbance is most influenced by Cu NPs in our work.

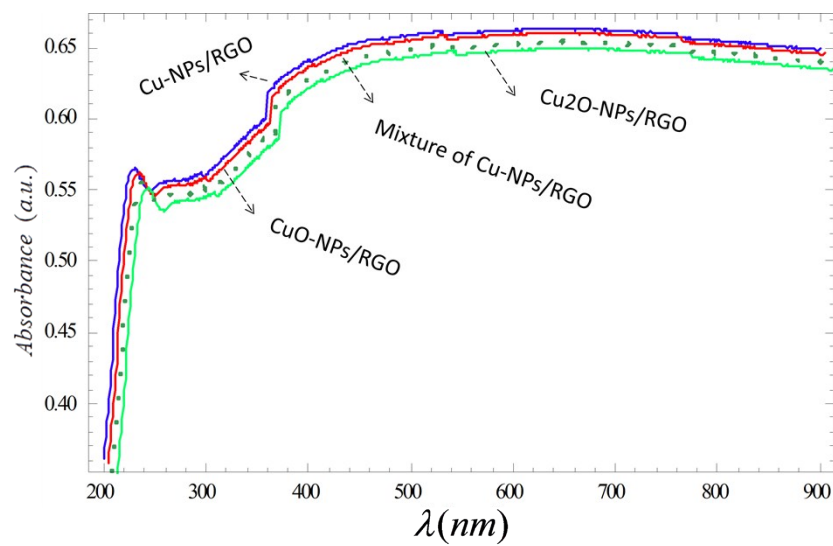

**Figure 1.** Calculated absorbance spectra for Cu, CuO, Cu<sub>2</sub>O and a mixture of Cu NPs on RGO.

### References:

1 <http://www.ioffe.ru/SVA/NSM/nk/>.
